# Supplementary material for: Intrinsic and Extrinsic Transcriptional Profiles That Affect the Clinical Response to PD-1 Inhibitors in Patients with Non–Small Cell Lung Cancer
Source: MDPI journal article supplement (doi:10.3390/cancers15010197), 2022-12-29
Supplement: s1 [file s1]

# Intrinsic and Extrinsic Transcriptional Profiles that Affect The Clinical Response to PD-1 Inhibitors in Patients with Non–Small Cell Lung Cancer

Hye Eun Byeon <sup>1</sup>, Seokjin Haam <sup>2</sup>, Jae Ho Han <sup>3</sup>, Hyun Woo Lee <sup>4</sup> and Young Wha Koh <sup>3</sup>

**Table S1.** Demographic and clinical characteristics of patients.

| Variable                    | Adenocarcinoma<br>( <i>n</i> = 31) (%) | Squamous cell carcinoma<br>( <i>n</i> = 26) (%) |
|-----------------------------|----------------------------------------|-------------------------------------------------|
| Age, median (range) (years) | 62 (40–84)                             | 71 (43–85)                                      |
| Male sex                    | 22 (71%)                               | 23 (88.5%)                                      |
| Smoking history             | 15 (68.2%)                             | 23 (92%)                                        |
| TNM stage                   |                                        |                                                 |
| III                         | 4 (12.9%)                              | 9 (34.6%)                                       |
| IV                          | 27 (87.1%)                             | 17 (65.4%)                                      |
| Specimen type               |                                        |                                                 |
| Biopsy                      | 21 (67.7%)                             | 19 (73.1%)                                      |
| Operation                   | 10 (32.3%)                             | 7 (26.9%)                                       |
| PD-1 inhibitor              |                                        |                                                 |
| Pembrolizumab               | 17 (54.8%)                             | 16 (61.5%)                                      |
| Nivolumab                   | 14 (45.2%)                             | 10 (38.5%)                                      |
| Genetic alteration status   |                                        |                                                 |
| EGFR-mutated                | 12 (40%)                               | 0 (0%)                                          |
| ALK-rearranged              | 0 (0%)                                 | 0 (0%)                                          |
| PD-L1 expression            |                                        |                                                 |
| >50%                        | 22 (71%)                               | 18 (69.2%)                                      |
| Response to PD-1 blockade   |                                        |                                                 |
| Responder                   | 7 (22.6%)                              | 6 (23.1%)                                       |
| Non-responder               | 24 (77.4%)                             | 20 (76.9%)                                      |

Smoking history was collected for 22 patients for adenocarcinoma and 25 patients for squamous cell carcinoma; EGFR test was performed for 30 patients for adenocarcinoma and 26 patients for squamous cell carcinoma.

**Table S2.** The gene list of 10 pathways.

| Activating Invasion and Metastasis ( <i>n</i> =149)                                                                                                                                                                                                                                                                                                                                                                                                                                                                                                                                                                                                                                                                                                                                                             |
|-----------------------------------------------------------------------------------------------------------------------------------------------------------------------------------------------------------------------------------------------------------------------------------------------------------------------------------------------------------------------------------------------------------------------------------------------------------------------------------------------------------------------------------------------------------------------------------------------------------------------------------------------------------------------------------------------------------------------------------------------------------------------------------------------------------------|
| ACTR3, AKT1, AMOTL2, AR, AURKA, AXL, BIRC5, CASP3, CAV1, CCL2, CCL21, CCR7, CD274, CD44, CD47, CDC20, CDH1, CDH11, CDH5, CEACAM1, COL4A1, COL4A2, COL6A1, COL6A2, COL6A3, CTNNA1, CTNNB1, CTNND1, CXCR4, DCN, DNMT1, DOCK1, EGF, EGFR, EPB41L3, EPCAM, ERBB2, ESR1, ESRP1, EZH2, FBLIM1, FBLN2, FBN1, FGFR1, FLT4, FMOD, FOXA1, FOXM1, FRMD6, FSTL1, GFPT2, GREM1, GRHL2, GSK3B, HDAC1, HGF, HIF1A, IGF1R, IL6, ITGA1, ITGA11, ITGA5, ITGA8, ITGAL, ITGAM, ITGAV, ITGAX, ITGB1, ITGB2, ITGB3, ITGB5, ITGB6, ITGB8, JAK2, JUN, JUP, KDM1A, KLK2, KRAS, LAMA2, LAMA4, LAMB1, LAMB3, LAMC1, LAMC2, LATS1, LCN2, LOX, LTBP1, MAPK1, MAPK3, MET, MMP9, MTOR, MUC1, MYC, MYL9, NANOG, NFKB1, PAK2, PARD3, PARVA, PDPK1, PGF, PIK3CA, POU5F1, PTEN, PTGS2, RAC3, RAF1, ROCK1, ROCK2, SAV1, SDC1, SERPINE1, SHH, SLIT2, |

---

SMAD7, SNAI1, SNAI2, SOX2, SRC, STAT3, STK3, STK4, TAZ, TEAD1, TEAD2, TGFB1, TGFB2, TGFB3, TGM2, THBS1, THBS2, TJP1, TLR4, TNF, TNS1, TOP2A, TP53, TP73, TPSAB1/B2, VEGFA, VWF, WNT5A, WWC1, WWTR1, YAP1, ZEB1

---

**Avoiding immune Destruction (n =122)**

---

ADORA2A, ADORA2B, ARG1, B2M, B4GALNT1, BCAP31, BLK, CARD11, CD163, CD19, CD209, CD22, CD244, CD247, CD27, CD274, CD276, CD28, CD38, CD3D, CD3E, CD3G, CD4, CD40, CD40LG, CD44, CD6, CD80, CD84, CD86, CD8A, CD8B, CDK4, CEACAM1, CTAG1A/B, CTLA4, CTSW, ENTPD1, ENTPD2, EOMES, FCRL2, FOLH1, FOS, GNLY, GPNMB, GRAP2, GZMA, GZMB, GZMH, GZMK, HAVCR2, HIF1A, HLA-A, HLA-B, HLA-C, HLA-DQA1, HLA-DRB1, HLA-E, ICOS, IDO1, IDO2, IFNG, IL10, ITK, JUN, KIR2DL3, KIR2DL4, KIR2DS4, KIR3DL1, KIR3DL2, KLK3, KLRB1, KLRD1, KLRG1, KLRK1, LAG3, LAT, LCK, MAGEC1, MAGEC2, MLANA, MS4A1, MS4A2, MS4A4A, MSLN, MST1R, MUC16, NCK1, NCR1, NFATC2, NKG7, NOS2, NT5E, PAK2, PDCD1, PDCD1LG2, PRF1, PSMB10, PSMB7, PSMB9, PTGS2, PTPN6, PTPRC, SELL, SPIB, TAP1, TAP2, TAPBP, TBX21, TCF7, TIGIT, TNF, TNFRSF18, TNFRSF4, TNFRSF9, TOX, TOX2, TOX3, TOX4, TRAT1, VAV1, ZAP70

---

**Deregulating Cellular Energetics (n=105)**

---

ABCC1, ACOT12, ACSL3, ADH1A, AKT1S1, ALDH1A3, ALDOA, ATF2, ATG101, ATG2B, ATG4B, ATOX1, ATP7A, AURKA, BHLHE40, BUB1, CACYBP, CCNF, CCS, CDC25A, CHMP2A, COX5B, CPT2, CREB1, CXCR4, CYBB, CYP4A11/22, EGLN3, EHHADH, EIF2AK3, EIF4EBP1, EIF4G1, ELOVL5, ERN1, ERO1A, GABARAP, GABPA, GLUD1, GLUD2, GLUL, GMPS, GPT, GPX1, GSR, GSTM4, HK2, HMOX1, IDH1, IDH2, ITGB2, KEAP1, LAMTOR1, LAMTOR2, LAMTOR4, LAMTOR5, LDHA, MAFG, MAPK14, MCM2, MCM4, MLST8, MTHFD2, MTOR, NCF1, NCF2, NCOA2, NCOR1, NDUFA2, NDUFB1, NFE2L2, NUDT2, P4HB, PDK1, PFKFB3, PFKP, PGK1, PIK3R4, PKM, PLK1, PRDX1, PRDX2, PRDX6, PRKACA, RB1CC1, RICTOR, RIMKLB, RPTOR, RRAGC, RRM2, SLC1A5, SLC2A1, SLC7A5, SOD1, SORD, SQLE, SQSTM1, SREBF1, STIP1, TPI1, TUBG1, TXN, TXN2, TXNRD2, UCHL5, XBP1

---

**Enabling Replicative Immortality (n=48)**

---

ABCG2, ATM, BCL2, CCNA2, CCNE1, CCNE2, CD34, CD44, CDK2, CDK4, CDK6, CDKN1A, CDKN2A, DKC1, DNA2, E2F1, E2F2, EPAS1, EZH2, FEN1, HMGA1, IGF1R, IL6, ITPR1, ITPR3, KRAS, LIG1, MAPK14, MDM2, MYC, NANOG, NFKB1, PCNA, POLE, POU5F1, PRIM1, RB1, RFC2, RFC3, RFC4, RPA3, RUVBL1, SOX2, STAT3, TERF2IP, TERT, TP53, WRAP53

---

**Evading Growth Suppressors (n=81)**

---

AURKA, AURKB, BRIP1, BUB1, BUB1B, CCNA2, CCNB1, CCNB2, CCND1, CCND2, CCNE1, CCNE2, CCNF, CCNK, CCNT1, CDC20, CDC25A, CDC25C, CDCA5, CDCA8, CDK1, CDK2, CDK4, CDK6, CDKN1A, CDKN2A, CENPA, CLSPN, COP1, DCBLD2, DKC1, DNA2, E2F1, E2F2, EXO1, FEN1, FOXM1, GTSE1, HJURP, IKZF1, KIF20A, KIF23, KIF2C, LIG1, LIN9, MCM2, MCM4, MDM2, MKI67, MYBL2, NCAPG, NEK2, NUF2, PCNA, PLK1, POLE, PRIM1, RAD51, RB1, RBL1, RBX1, RFC2, RFC3, RFC4, RPA3, RRM2, RUVBL1, SFN, SKA1, SKP2, SMC3, STAG2, TFDP1, TOP2A, TP53, TPX2, TTK, TUBG1, UBE2C, WEE1, WRAP53

---

**Genome Instability & Mutation (n=111)**

---

AGO2, AGO4, ARID1A, ARID1B, ARID2, ARID4A, ARID4B, ASXL2, ATF2, ATF4, ATF7IP, ATM, ATR, ATRX, ATXN7, BAX, BCL2A1, BCL2L1, BIRC3, BLM, BRCA1, BRCA2, BRIP1, BRMS1, CBX2, CCNK, CCNT1, CD14, CD40, CD86, CDK12, CHEK1, CHEK2, CLOCK, CLSPN, COP1, CREBBP, CSF1R, DICER1, DNA2, DTL, EME1, EP300, EPC1, EXO1, EZH2, FANCA, FANCD2, FANCI, FEN1, GTSE1, H2AX, HDAC1, JMJD1C, KAT2B, KAT6A, KAT6B, KDM1A, KDM3B, KDM5A, KDM6A, KLF5, KMT2A, KMT2D, KPNA2, LIG1, MDM2, MLH1, MSH2, MYC, NCOR1, NEIL3, NSD1,

---

---

PARP1, PARP2, PARP3, PBRM1, PCLAF, PCNA, PMAIP1, POLE, RAD51, RAD51AP1, RAD54B, RAD54L, RBBP5, RNF111, RPA3, RUNX1, RUVBL1, SERPINB5, SETD2, SF3B1, SIN3A, SOD1, SPINT1, SSRP1, SUPT16H, TET2, TIMELESS, TMPRSS2, TP53, TP73, TRAF1, TRRAP, UBE2T, VCP, XRCC2, ZEB1, ZMYM2

---

**Inducing Angiogenesis (n=69)**

---

ABI1, ADM, ALDOA, ANGPT2, CA9, COL4A1, COL4A2, COL6A1, COL6A2, COL6A3, CRK, EDN1, EGLN3, EP300, FLT1, FLT4, GRB7, HIF1A, HK2, HMOX1, HRAS, HSPB1, IGFBP3, KDR, LDHA, LTBR, MAPK13, MAPK14, NCK1, NOS2, NOS3, NRAS, P4HA2, PDGFB, PDGFRA, PDGFRB, PDK1, PFKFB3, PFKP, PGK1, PIK3CA, PIK3CB, PIK3R1, PIK3R2, PKM, PLA2G4A, PLCG2, PRKCB, RASA1, RBX1, SERPINE1, SLC2A1, SOS1, SPHK2, SRC, STAT1, STAT3, TEK, TGFB3, THBS1, THBS2, TP11, VEGFA, VEGFB, VEGFC, VEGFD, WASF2, NRP1, HBEGF

---

**Resisting Cell Death (n=24)**

---

BAD, BAX, BCL2, BCL2A1, BCL2L1, CASP3, CD27, FAS, FASLG, GZMB, LMNB1, MAPK8, PMAIP1, TNF, TNFRSF17, TNFRSF18, TNFRSF4, TNFRSF9, TNFSF11, TNFSF13B, TNFSF14, TNFSF8, TP53, TNFRSF1B

---

**Sustaining Proliferative Signaling (n=225)**

---

ABCC4, ABL1, ACSL3, ACTG2, AGO2, AGO4, AIMP2, AKT1, AKT1S1, AKT2, AKT3, ALDH1A3, ALK, APC, AR, ARID1A, ATF2, ATF4, B4GALT1, BHLHE40, BMPR1A, BMPR2, BRAF, BRCA1, BTK, BYSL, CACYBP, CALML3, CCNA2, CCNE1, CCNT1, CDCP1, CDK1, CDK4, CDK6, CHD8, CREB1, CRK, CSF2RA, CSF2RB, CTNNB1, CXXC5, DCN, DLL3, DUSP6, EGF, EGFR, EIF4EBP1, ELOVL5, EP300, ERBB2, ERBB3, ESR1, ESR2, ESRP1, ESRP2, FAM83A, FASLG, FBLN2, FBN1, FGF7, FGFBP1, FGFR1, FGFR2, FGFR3, FLT3, FMOD, FOXA1, FOXP1, FZD1, FZD4, FZD7, FZD8, GALNT3, GNAI3, GRB7, GREM1, GSK3B, GSR, HDAC1, HGF, HK2, HRAS, HSPB1, IL11, IL2RA, IL2RB, IL2RG, IL3RA, IL6, INHBA, IQGAP1, ITGAV, ITGB1, ITGB3, JAG1, JAK1, JAK2, JAK3, JUN, KAT2B, KDM1A, KIT, KLK2, KLK3, KLK4, KPNA2, KRAS, KRT16, KRT17, LAMA2, LAMA4, LAMB1, LAMB3, LAMC1, LAMC2, LAMTOR2, LDHA, LOX, LRRC32, LTBP1, MALL, MAML2, MAP2K1, MAP2K2, MAP3K14, MAP3K7, MAP4K1, MAPK1, MAPK13, MAPK14, MAPK3, MAPK8, MCM4, MET, MGA, MYB, MYC, NBL1, NCOA2, NCOR1, NF1, NKX3-1, NME1, NOS3, NOTCH3, NRAS, P4HB, PA2G4, PAK2, PDGFB, PDGFRA, PDGFRB, PDLIM5, PHB, PIK3CA, PIK3CB, PIK3CD, PIK3R1, PIK3R2, PIK3R3, PIK3R4, PIK3R5, PLCB3, PLEK2, PLK1, PPAN, PRKACA, PRKCA, PSMB10, PSMB7, PSMB9, PTCH1, PTCH2, PTEN, PTGS2, RAC3, RAF1, RALB, RASA1, RB1, RBBP5, RBL1, RBX1, RET, RUNX1, RUVBL1, SH3PXD2A, SHH, SKIL, SKP2, SMAD7, SMC3, SMO, SMS, SORD, SOS1, SOX7, SPDEF, SPINT1, SPINT2, SRC, SRM, STAG2, STAT3, TBRG4, TCF7, TCOF1, TEK, TERT, TFDPI, TGFB1, TGFB2, TGFB3, TGFB2, THBS1, TMPRSS2, TNS4, TPD52, TRRAP, TSPAN1, UGDH, VCP, VWF, WNT5A

---

**Tumor-promoting Inflammation (n=188)**

---

ACKR2, ACKR3, ADAMDEC1, B2M, BCL2A1, BCL2L1, BIRC3, BTK, C3AR1, CARD11, CCL13, CCL19, CCL2, CCL21, CCL4, CCL5, CCR1, CCR2, CCR4, CCR5, CCR7, CD14, CD300A, CD33, CD37, CD40, CD40LG, CD44, CD47, CD53, CD68, CEACAM1, CEACAM3, CFLAR, CGAS, CHUK, CLEC4A, CMKLR1, CRK, CSF1R, CSF2RA, CSF2RB, CSF3R, CXCL10, CXCL11, CXCL9, CXCR2, CXCR4, CXCR6, CYBB, CYFIP1, DAPP1, DOCK2, EIF4G1, F13A1, FCAR, FCER1G, FCGR3A/B, FPR1, GNAI3, GSTM4, HAVCR2, HCK, HLA-A, HLA-B, HLA-C, HLA-DQA1, HLA-DRB1, HLA-E, HUWE1, ICAM1, IFNA1, IFNAR1, IFNAR2, IFNG, IFNGR2, IKBKG, IL10, IL10RA, IL11, IL12B, IL12RB1, IL15, IL15RA, IL21R, IL22RA2, IL27RA, IL2RA, IL2RB, IL2RG, IL3RA, IL4R, IL6, IL6ST, IL7, IL7R, IL9R, IRF1, IRF3, IRF4, IRF7, IRF8, ITGAL, ITGAM, ITGAV, ITGAX, ITGB1, ITGB2, ITGB3, ITK, JAK1, JAK2, JAK3, KPNA2, LAIR1, LAPTM5, LAT,

---

LCK, LCN2, LILRB2, LTA, LTB, LTBR, LY96, LYN, MAP3K14, MAP3K7, MAPK3, MCL1, MKNK1, MNDA, MX1, MYD88, NFAM1, NFKB1, NFKB2, NOS2, OAS1, OAS2, OAS3, OSM, OSMR, PA2G4, PARP1, PKM, PLA2, PLCG2, PRDM1, PRKCB, PSMB10, PSMB9, PTGER1, PTGER2, PTGER3, PTGER4, PTGS2, PTPN6, RAF1, REL, RELB, S100A12, SDC1, SELL, SIGLEC5, SIGLEC9, SIRPA, SLPI, SOCS1, SOCS3, SQSTM1, STAT1, STAT3, STAT4, STING1, SYK, TLR3, TLR4, TNF, TNFAIP3, TNFSF11, TNFSF13B, TNFSF14, TRAF1, TRAF6, TYROBP, VCP, XCL1/2, ZAP70

**Table S3.** 100 genes involved in response to PD-1 inhibitors.

**A.** Non-small cell carcinoma.

|          | ANOVA value | Fold change | Pathway   |
|----------|-------------|-------------|-----------|
| IL15RA   | 22.655556   | 1.89        | Extrinsic |
| CCR1     | 22.171206   | 2.25        | Extrinsic |
| CCL2     | 21.985962   | 2.9         | Extrinsic |
| CYBB     | 20.290789   | 2.52        | Extrinsic |
| FCER1G   | 18.919663   | 2.43        | Extrinsic |
| PDCD1LG2 | 15.977685   | 2.55        | Extrinsic |
| CD274    | 15.707638   | 2.03        | Extrinsic |
| FCGR3A/B | 14.036684   | 2.2         | Extrinsic |
| CCL13    | 13.920592   | 3.38        | Extrinsic |
| LAG3     | 13.748618   | 2.98        | Extrinsic |
| NKG7     | 13.299997   | 3.32        | Extrinsic |
| CXCL10   | 13.083803   | 4.72        | Extrinsic |
| GREM1    | 12.973208   | 3.04        | Intrinsic |
| TAP1     | 12.686163   | 2.05        | Extrinsic |
| CD68     | 12.549599   | 2.12        | Extrinsic |
| CD14     | 12.457989   | 2.18        | Extrinsic |
| LAPTM5   | 11.800395   | 1.95        | Extrinsic |
| HAVCR2   | 11.799847   | 1.82        | Extrinsic |
| AURKA    | 11.677235   | 1.62        | Intrinsic |
| GZMH     | 11.658875   | 2.5         | Extrinsic |
| CGAS     | 11.626901   | 1.62        | Extrinsic |
| GZMB     | 11.568193   | 2.92        | Extrinsic |
| STAT1    | 11.537315   | 1.77        | Extrinsic |
| CMKLR1   | 11.326467   | 2.11        | Extrinsic |
| B2M      | 10.675469   | 1.73        | Extrinsic |
| IL2RA    | 10.48627    | 1.94        | Extrinsic |
| AXL      | 10.463373   | 1.73        | Intrinsic |
| RRM2     | 10.180753   | 1.77        | Intrinsic |
| PRF1     | 10.10217    | 2.41        | Extrinsic |
| CDC25A   | 10.009255   | 1.56        | Intrinsic |
| CD300A   | 9.995729    | 1.78        | Extrinsic |
| C3AR1    | 9.9701823   | 1.88        | Extrinsic |
| TAP2     | 9.8921552   | 1.69        | Extrinsic |
| HLA-DRB1 | 9.8537477   | 2.41        | Extrinsic |
| PRIM1    | 9.7894058   | 1.4         | Intrinsic |
| CCNB1    | 9.7169622   | 1.62        | Intrinsic |
| CD86     | 9.6346643   | 1.78        | Extrinsic |

|          |           |       |           |
|----------|-----------|-------|-----------|
| ATP7A    | 9.6058667 | -1.48 | Intrinsic |
| SIGLEC9  | 9.4338831 | 1.93  | Extrinsic |
| CD53     | 9.3170357 | 2.03  | Extrinsic |
| PCLAF    | 9.1975509 | 1.65  | Intrinsic |
| LMNB1    | 9.1441948 | 1.42  | Intrinsic |
| CD209    | 8.7312353 | 2.15  | Extrinsic |
| ADAMDEC1 | 8.4634085 | 1.91  | Extrinsic |
| ERBB2    | 8.3342401 | -1.81 | Intrinsic |
| PSMB9    | 8.2141712 | 1.68  | Extrinsic |
| ITGB2    | 8.2021328 | 1.84  | Extrinsic |
| CTSW     | 8.2019558 | 1.84  | Extrinsic |
| NSD1     | 8.0970647 | -1.3  | Intrinsic |
| TLR4     | 8.0094864 | 1.65  | Extrinsic |
| LILRB2   | 7.9535134 | 1.91  | Extrinsic |
| KAT6B    | 7.9463474 | -1.43 | Intrinsic |
| CDCA8    | 7.908568  | 1.53  | Intrinsic |
| KIF2C    | 7.8634048 | 1.64  | Intrinsic |
| SRM      | 7.8106478 | 1.4   | Intrinsic |
| GPX1     | 7.8019435 | 1.48  | Intrinsic |
| PIK3CB   | 7.6888667 | 1.35  | Intrinsic |
| GNLY     | 7.5283591 | 2.06  | Extrinsic |
| CCL5     | 7.3616888 | 2.72  | Extrinsic |
| GZMA     | 7.3589661 | 2.24  | Extrinsic |
| MYBL2    | 7.3133823 | 1.95  | Intrinsic |
| RUVBL1   | 7.2820733 | 1.45  | Intrinsic |
| IRF1     | 7.236472  | 1.85  | Extrinsic |
| MSLN     | 7.1509685 | 2.3   | Extrinsic |
| IL10RA   | 7.1421187 | 1.75  | Extrinsic |
| CD4      | 6.9144379 | 1.68  | Extrinsic |
| BCL2L1   | 6.7691304 | 1.39  | Extrinsic |
| UBE2C    | 6.7544829 | 1.94  | Intrinsic |
| RBBP5    | 6.7533955 | -1.29 | Intrinsic |
| CD38     | 6.6936116 | 1.85  | Extrinsic |
| FASLG    | 6.6273815 | 2.19  | Intrinsic |
| IL2RB    | 6.5646715 | 1.93  | Extrinsic |
| ARID4B   | 6.5574569 | -1.38 | Intrinsic |
| NCAPG    | 6.5512608 | 1.5   | Intrinsic |
| OAS3     | 6.4690085 | 1.67  | Extrinsic |
| PIK3R5   | 6.4114815 | 1.75  | Intrinsic |
| CAV1     | 6.3690473 | 2.07  | Intrinsic |
| MS4A4A   | 6.2625204 | 1.99  | Extrinsic |
| CLEC4A   | 6.0410451 | 2.01  | Extrinsic |
| KLRD1    | 6.0374337 | 2.15  | Extrinsic |
| BAX      | 6.0337196 | 1.26  | Intrinsic |
| MYC      | 6.0084481 | 1.56  | Intrinsic |
| OAS1     | 5.98349   | 1.52  | Extrinsic |
| ITGAM    | 5.9829251 | 1.79  | Extrinsic |
| ITGA5    | 5.9066126 | 1.56  | Intrinsic |
| TAPBP    | 5.8615461 | 1.33  | Extrinsic |

|        |           |       |           |
|--------|-----------|-------|-----------|
| CCNA2  | 5.7824406 | 1.36  | Intrinsic |
| SMO    | 5.7410309 | -2.02 | Intrinsic |
| CD163  | 5.7249899 | 2.06  | Extrinsic |
| EOMES  | 5.6548774 | 1.64  | Extrinsic |
| KDM6A  | 5.6475676 | -1.45 | Intrinsic |
| GZMK   | 5.5740863 | 2.38  | Extrinsic |
| CD244  | 5.5169676 | 1.71  | Extrinsic |
| PSMB10 | 5.5139717 | 1.46  | Extrinsic |
| CDC20  | 5.5036848 | 1.76  | Intrinsic |
| CCR5   | 5.5019449 | 1.88  | Extrinsic |
| MCM2   | 5.4992169 | 1.51  | Intrinsic |
| PA2G4  | 5.4101147 | 1.19  | Extrinsic |
| BUB1B  | 5.3976924 | 1.45  | Intrinsic |
| IFNG   | 5.3699566 | 2     | Extrinsic |

#### B. Adenocarcinoma.

|         | ANOVA value | Fold change | Pathway   |
|---------|-------------|-------------|-----------|
| MYC     | 20.26       | 2.32        | Intrinsic |
| RRM2    | 17.29       | 2.15        | Intrinsic |
| MAPK14  | 16.59       | -1.57       | Intrinsic |
| MYBL2   | 16.07       | 2.28        | Intrinsic |
| AXL     | 16.07       | 2.32        | Intrinsic |
| CDCA5   | 14.56       | 2.14        | Intrinsic |
| AKT1S1  | 14.43       | 1.58        | Intrinsic |
| TGFB1   | 13.79       | 2.19        | Intrinsic |
| CD209   | 13.74       | 2.7         | Extrinsic |
| CDK12   | 13.73       | -1.87       | Intrinsic |
| PCLAF   | 13.49       | 2.04        | Intrinsic |
| BAX     | 13.33       | 1.51        | Intrinsic |
| CCL13   | 12.53       | 4           | Extrinsic |
| LAG3    | 12.46       | 2.86        | Extrinsic |
| HMOX1   | 11.96       | 2.47        | Intrinsic |
| ARID4A  | 11.67       | -1.64       | Intrinsic |
| SLC1A5  | 11.49       | 1.54        | Intrinsic |
| ARID4B  | 11.30       | -1.78       | Intrinsic |
| DNMT1   | 11.05       | 1.82        | Intrinsic |
| BCL2L1  | 10.78       | 1.88        | Extrinsic |
| MKI67   | 10.67       | 2.11        | Intrinsic |
| PGK1    | 10.61       | 1.76        | Intrinsic |
| HLA-C   | 10.56       | 1.76        | Extrinsic |
| SRM     | 10.28       | 1.6         | Intrinsic |
| KMT2A   | 10.01       | -1.52       | Intrinsic |
| TUBG1   | 9.76        | 1.5         | Intrinsic |
| HJURP   | 9.75        | 1.95        | Intrinsic |
| EIF2AK3 | 9.61        | -1.48       | Intrinsic |
| IL15RA  | 9.59        | 1.9         | Extrinsic |
| MSLN    | 9.06        | 2.43        | Extrinsic |
| TAP1    | 8.86        | 1.88        | Extrinsic |
| E2F1    | 8.85        | 1.79        | Intrinsic |

|          |      |       |           |
|----------|------|-------|-----------|
| BRAF     | 8.83 | -1.5  | Intrinsic |
| ATP7A    | 8.76 | -1.69 | Intrinsic |
| CD8A     | 8.61 | 3.1   | Extrinsic |
| NKG7     | 8.41 | 3.19  | Extrinsic |
| SFN      | 8.40 | 2.39  | Intrinsic |
| TAP2     | 8.39 | 1.6   | Extrinsic |
| BUB1     | 8.36 | 1.81  | Intrinsic |
| MST1R    | 8.28 | 1.99  | Extrinsic |
| CCL5     | 8.20 | 2.83  | Extrinsic |
| CCL2     | 8.19 | 2.35  | Extrinsic |
| TET2     | 8.13 | -1.99 | Intrinsic |
| NSD1     | 8.08 | -1.37 | Intrinsic |
| KAT6B    | 8.01 | -1.42 | Intrinsic |
| FASLG    | 7.94 | 1.93  | Intrinsic |
| CAV1     | 7.81 | 2.67  | Intrinsic |
| AURKB    | 7.79 | 2.2   | Intrinsic |
| GREM1    | 7.79 | 3.2   | Intrinsic |
| PIK3R2   | 7.67 | 1.74  | Intrinsic |
| CYBB     | 7.67 | 2.09  | Extrinsic |
| ABL1     | 7.64 | 1.55  | Intrinsic |
| CD68     | 7.59 | 2.17  | Extrinsic |
| EIF4EBP1 | 7.57 | 1.74  | Intrinsic |
| IL2RA    | 7.56 | 2.21  | Extrinsic |
| ATF2     | 7.55 | -1.32 | Intrinsic |
| PMAIP1   | 7.29 | 2.05  | Intrinsic |
| CCND1    | 7.20 | 1.84  | Intrinsic |
| PIK3R4   | 7.20 | -1.52 | Intrinsic |
| MGA      | 7.19 | -1.61 | Intrinsic |
| AURKA    | 7.19 | 1.65  | Intrinsic |
| MCM2     | 7.16 | 1.84  | Intrinsic |
| LAMA4    | 7.11 | 2.43  | Intrinsic |
| NT5E     | 7.05 | 1.86  | Extrinsic |
| KDM6A    | 7.04 | -1.85 | Intrinsic |
| TPI1     | 6.97 | 1.47  | Intrinsic |
| EPC1     | 6.84 | -1.94 | Intrinsic |
| TRAF6    | 6.83 | -1.35 | Extrinsic |
| CD274    | 6.81 | 1.91  | Extrinsic |
| FANCA    | 6.79 | 1.54  | Intrinsic |
| PARP3    | 6.74 | -1.57 | Intrinsic |
| ATG2B    | 6.60 | -1.64 | Intrinsic |
| NFKB2    | 6.56 | 1.49  | Extrinsic |
| MAP2K1   | 6.52 | 1.43  | Intrinsic |
| PRIM1    | 6.52 | 1.43  | Intrinsic |
| DAPP1    | 6.48 | -2.04 | Extrinsic |
| TNS4     | 6.34 | 2.71  | Intrinsic |
| DOCK1    | 6.26 | -1.65 | Intrinsic |
| ASH1L    | 6.24 | -1.42 | Intrinsic |
| CD14     | 6.18 | 2.18  | Extrinsic |
| CCR1     | 6.17 | 1.75  | Extrinsic |

|          |      |       |           |
|----------|------|-------|-----------|
| RUVBL1   | 6.17 | 1.7   | Intrinsic |
| GLUD1    | 6.16 | 1.61  | Intrinsic |
| ZMYM2    | 6.09 | -1.99 | Intrinsic |
| IL7R     | 6.06 | 2.47  | Extrinsic |
| FCGR3A/B | 6.03 | 1.8   | Extrinsic |
| LTBR     | 6.01 | 2.01  | Extrinsic |
| ERBB2    | 5.97 | -1.92 | Intrinsic |
| STAT1    | 5.96 | 1.56  | Extrinsic |
| CDK4     | 5.96 | 1.52  | Extrinsic |
| PDCD1LG2 | 5.84 | 1.68  | Extrinsic |
| CCNB1    | 5.84 | 1.82  | Intrinsic |
| GABPA    | 5.78 | -1.55 | Intrinsic |
| TPX2     | 5.56 | 1.85  | Intrinsic |
| BYSL     | 5.52 | 1.44  | Intrinsic |
| TIMELESS | 5.51 | 1.51  | Intrinsic |
| KEAP1    | 5.46 | 1.48  | Intrinsic |
| NCOA2    | 5.45 | -1.49 | Intrinsic |
| VEGFB    | 5.44 | -1.42 | Intrinsic |
| IL9R     | 5.43 | 2.23  | Extrinsic |

### C. Squamous cell carcinoma.

|          | ANOVA value | Fold change | Pathway   |
|----------|-------------|-------------|-----------|
| CCR1     | 17.49       | 3.04        | Extrinsic |
| FCER1G   | 16.13       | 3.33        | Extrinsic |
| SERPINE1 | 15.91       | 2.91        | Intrinsic |
| CD38     | 15.10       | 3.46        | Extrinsic |
| GNLY     | 14.65       | 4.38        | Extrinsic |
| CYBB     | 14.33       | 3.15        | Extrinsic |
| IL15RA   | 14.05       | 1.89        | Extrinsic |
| CCL2     | 14.00       | 3.73        | Extrinsic |
| VAV1     | 13.73       | 2.61        | Extrinsic |
| CD274    | 13.48       | 2.19        | Extrinsic |
| GZMB     | 13.22       | 4.16        | Extrinsic |
| GZMH     | 13.20       | 3.82        | Extrinsic |
| CD300A   | 12.85       | 2.7         | Extrinsic |
| HAVCR2   | 12.65       | 2.6         | Extrinsic |
| ICAM1    | 11.85       | 2.13        | Extrinsic |
| CTSW     | 11.79       | 3.38        | Extrinsic |
| MS4A4A   | 11.67       | 2.95        | Extrinsic |
| SIGLEC9  | 10.97       | 2.73        | Extrinsic |
| PDCD1LG2 | 10.74       | 4.19        | Extrinsic |
| CXCL10   | 10.35       | 6.8         | Extrinsic |
| CSF2RA   | 10.26       | 2.87        | Extrinsic |
| PIK3R5   | 10.24       | 2.61        | Intrinsic |
| CD86     | 10.14       | 2.46        | Extrinsic |
| LYN      | 10.13       | 1.76        | Extrinsic |
| PDCD1    | 9.69        | 2.52        | Extrinsic |
| PTPRC    | 9.68        | 2.63        | Extrinsic |



|          |      |       |           |
|----------|------|-------|-----------|
| LY96     | 9.65 | 2.45  | Extrinsic |
| CD53     | 9.59 | 2.59  | Extrinsic |
| PRF1     | 9.53 | 2.95  | Extrinsic |
| PIK3CB   | 9.44 | 1.67  | Intrinsic |
| NKG7     | 9.23 | 3.44  | Extrinsic |
| ITGB2    | 9.20 | 2.57  | Extrinsic |
| CMKLR1   | 8.95 | 2.65  | Extrinsic |
| ACKR2    | 8.90 | 3.26  | Extrinsic |
| ITGAM    | 8.30 | 2.26  | Extrinsic |
| RPA3     | 8.22 | 1.38  | Intrinsic |
| KIF2C    | 7.91 | 1.71  | Intrinsic |
| ABCG2    | 7.83 | 2.28  | Intrinsic |
| UBE2C    | 7.81 | 1.68  | Intrinsic |
| FCGR3A/B | 7.76 | 2.81  | Extrinsic |
| RAF1     | 7.75 | 1.36  | Intrinsic |
| LILRB2   | 7.65 | 2.78  | Extrinsic |
| CCR2     | 7.62 | 2.86  | Extrinsic |
| NFATC2   | 7.42 | 2.38  | Extrinsic |
| TRAT1    | 7.40 | 2.56  | Extrinsic |
| NCR1     | 7.33 | 2.38  | Extrinsic |
| IL10RA   | 7.21 | 2.34  | Extrinsic |
| NCF2     | 7.19 | 2.62  | Intrinsic |
| CGAS     | 7.11 | 1.89  | Extrinsic |
| C3AR1    | 7.00 | 2.16  | Extrinsic |
| LAG3     | 6.99 | 3.09  | Extrinsic |
| CD3E     | 6.93 | 2.52  | Extrinsic |
| IRF1     | 6.93 | 2.31  | Extrinsic |
| ADAMDEC1 | 6.82 | 2.18  | Extrinsic |
| KDM1A    | 6.81 | 1.49  | Intrinsic |
| TERT     | 6.71 | 2.82  | Intrinsic |
| HLA-DQA1 | 6.67 | 5.54  | Extrinsic |
| CDCA8    | 6.60 | 1.73  | Intrinsic |
| KIR2DL4  | 6.52 | 2.01  | Extrinsic |
| B2M      | 6.47 | 2.12  | Extrinsic |
| JAG1     | 6.38 | -3.03 | Intrinsic |
| CD244    | 6.31 | 2.66  | Extrinsic |
| CD14     | 6.25 | 2.18  | Extrinsic |
| LAPTM5   | 6.24 | 2.25  | Extrinsic |
| CD4      | 6.20 | 2.11  | Extrinsic |
| ELOVL5   | 6.13 | 1.84  | Intrinsic |
| CDC25A   | 6.13 | 1.59  | Intrinsic |
| IQGAP1   | 6.07 | 1.48  | Intrinsic |
| CCNA2    | 6.03 | 1.45  | Intrinsic |
| GREM1    | 5.99 | 2.87  | Intrinsic |
| RAD51    | 5.93 | 1.66  | Intrinsic |
| AMOTL2   | 5.67 | 1.66  | Intrinsic |
| ADORA2A  | 5.66 | 1.86  | Extrinsic |
| CD27     | 5.65 | 2.96  | Extrinsic |
| ATOX1    | 5.52 | 1.62  | Intrinsic |

|          |      |       |           |
|----------|------|-------|-----------|
| BCL2A1   | 5.44 | 3.72  | Extrinsic |
| TAP1     | 5.43 | 2.27  | Extrinsic |
| TBX21    | 5.39 | 2.01  | Extrinsic |
| GZMA     | 5.39 | 2.73  | Extrinsic |
| STAT1    | 5.34 | 2.06  | Extrinsic |
| HSD11B1  | 5.21 | 3.06  | Intrinsic |
| CCR5     | 5.19 | 2.88  | Extrinsic |
| CD247    | 5.15 | 2.14  | Extrinsic |
| AURKA    | 5.14 | 1.58  | Intrinsic |
| NF1      | 5.12 | -1.53 | Intrinsic |
| MNDA     | 5.05 | 2.7   | Extrinsic |
| SMO      | 4.97 | -3.09 | Intrinsic |
| CD68     | 4.95 | 2.08  | Extrinsic |
| FLT1     | 4.93 | 2     | Intrinsic |
| LMNB1    | 4.92 | 1.47  | Intrinsic |
| PTCH1    | 4.89 | -2.16 | Intrinsic |
| FZD7     | 4.88 | -2.99 | Intrinsic |
| KLRD1    | 4.84 | 2.72  | Extrinsic |
| EOMES    | 4.67 | 2.31  | Extrinsic |
| PTGER2   | 4.63 | 1.79  | Extrinsic |
| ARID1B   | 4.63 | -1.31 | Intrinsic |
| SH3PXD2A | 4.58 | -1.58 | Intrinsic |
| EPB41L3  | 4.55 | 1.67  | Intrinsic |
| GPX1     | 4.51 | 1.52  | Intrinsic |
| SIGLEC5  | 4.49 | 2.04  | Extrinsic |

**Table S4.** The determination of the optimal number of genes.

**Intrinsic pathway related genes in total 57 NSCLC.**

|             | kNN   | SVM   | RF    | NN    | NB    | LR    | AUC_sum |
|-------------|-------|-------|-------|-------|-------|-------|---------|
| 5 features  | 0.730 | 0.607 | 0.736 | 0.808 | 0.778 | 0.825 | 4.484   |
| 10 features | 0.691 | 0.722 | 0.709 | 0.792 | 0.759 | 0.699 | 4.372   |
| 15 features | 0.741 | 0.830 | 0.673 | 0.766 | 0.802 | 0.787 | 4.599   |
| 20 features | 0.736 | 0.805 | 0.742 | 0.804 | 0.830 | 0.699 | 4.616   |
| 25 features | 0.742 | 0.851 | 0.599 | 0.815 | 0.851 | 0.747 | 4.605   |
| 30 features | 0.743 | 0.879 | 0.828 | 0.808 | 0.858 | 0.719 | 4.835   |

**Extrinsic pathway related genes in total 57 NSCLC.**

|             | kNN   | SVM   | RF    | NN    | NB    | LR    | AUC_sum |
|-------------|-------|-------|-------|-------|-------|-------|---------|
| 5 features  | 0.745 | 0.780 | 0.807 | 0.816 | 0.823 | 0.785 | 4.756   |
| 10 features | 0.726 | 0.834 | 0.900 | 0.801 | 0.823 | 0.344 | 4.428   |
| 15 features | 0.813 | 0.825 | 0.779 | 0.806 | 0.839 | 0.325 | 4.387   |
| 20 features | 0.705 | 0.827 | 0.783 | 0.769 | 0.829 | 0.271 | 4.184   |
| 25 features | 0.582 | 0.827 | 0.766 | 0.757 | 0.820 | 0.456 | 4.208   |
| 30 features | 0.520 | 0.815 | 0.722 | 0.781 | 0.820 | 0.505 | 4.163   |

**Intrinsic pathway related genes in lung adenocarcinoma.**

|            | kNN   | SVM   | RF    | NN    | NB    | LR    | AUC_sum |
|------------|-------|-------|-------|-------|-------|-------|---------|
| 5 features | 0.857 | 0.964 | 0.938 | 0.952 | 0.964 | 0.946 | 5.621   |

|             |       |       |       |       |       |       |       |
|-------------|-------|-------|-------|-------|-------|-------|-------|
| 10 features | 0.884 | 0.988 | 0.887 | 0.982 | 0.982 | 0.976 | 5.699 |
| 15 features | 0.902 | 0.976 | 0.929 | 0.946 | 0.994 | 1     | 5.747 |
| 20 features | 0.857 | 1     | 0.821 | 1     | 1     | 0.982 | 5.66  |
| 25 features | 0.857 | 1     | 0.765 | 1     | 0.994 | 0.946 | 5.562 |
| 30 features | 0.839 | 1     | 0.893 | 1     | 0.994 | 0.929 | 5.655 |

**Extrinsic pathway related genes in lung adenocarcinoma.**

|             | kNN   | SVM   | RF    | NN    | NB    | LR    | AUC_sum |
|-------------|-------|-------|-------|-------|-------|-------|---------|
| 5 features  | 0.726 | 0.851 | 0.744 | 0.756 | 0.851 | 0.702 | 4.63    |
| 10 features | 0.622 | 0.905 | 0.747 | 0.732 | 0.851 | 0.795 | 4.652   |
| 15 features | 0.696 | 1     | 0.884 | 0.881 | 0.839 | 0.673 | 4.973   |
| 20 features | 0.783 | 1     | 0.696 | 0.893 | 0.887 | 0.655 | 4.914   |
| 25 features | 0.812 | 0.994 | 0.738 | 0.839 | 0.899 | 0.5   | 4.782   |
| 30 features | 0.827 | 0.994 | 0.804 | 0.923 | 0.923 | 0.268 | 4.739   |

**Intrinsic pathway related genes in lung squamous cell carcinoma.**

|             | kNN   | SVM   | RF    | NN    | NB    | LR    | AUC_sum |
|-------------|-------|-------|-------|-------|-------|-------|---------|
| 5 features  | 0.708 | 0.808 | 0.783 | 0.842 | 0.900 | 0.742 | 4.783   |
| 10 features | 0.638 | 0.792 | 0.742 | 0.758 | 0.867 | 0.383 | 4.18    |
| 15 features | 0.708 | 0.808 | 0.721 | 0.717 | 0.858 | 0.658 | 4.47    |
| 20 features | 0.671 | 0.842 | 0.646 | 0.775 | 0.833 | 0.717 | 4.484   |
| 25 features | 0.671 | 0.833 | 0.754 | 0.775 | 0.825 | 0.742 | 4.6     |
| 30 features | 0.671 | 0.825 | 0.754 | 0.775 | 0.850 | 0.733 | 4.608   |

**Extrinsic pathway related genes in lung squamous cell carcinoma.**

|             | kNN   | SVM   | RF    | NN    | NB    | LR    | AUC_sum |
|-------------|-------|-------|-------|-------|-------|-------|---------|
| 5 features  | 0.783 | 0.6   | 0.908 | 0.692 | 0.842 | 0.458 | 4.283   |
| 10 features | 0.675 | 0.792 | 0.871 | 0.675 | 0.883 | 0.525 | 4.421   |
| 15 features | 0.675 | 0.633 | 0.842 | 0.608 | 0.867 | 0.212 | 3.837   |
| 20 features | 0.817 | 0.750 | 0.850 | 0.658 | 0.892 | 0.275 | 4.242   |
| 25 features | 0.817 | 0.692 | 0.867 | 0.750 | 0.883 | 0.354 | 4.363   |
| 30 features | 0.75  | 0.708 | 0.775 | 0.667 | 0.867 | 0.342 | 4.109   |

**Table S5.** Classification performances of machine-learning models.

**A.** 30 intrinsic pathway-associated genes in non-small cell carcinoma.

| Method                 | AUC   | Accuracy | F1    | Precision | Recall | Sum   |
|------------------------|-------|----------|-------|-----------|--------|-------|
| K-nearest neighbors    | 0.743 | 0.807    | 0.779 | 0.788     | 0.807  | 3.924 |
| Logistic regression    | 0.719 | 0.807    | 0.809 | 0.812     | 0.807  | 3.954 |
| Naïve Bayes            | 0.858 | 0.772    | 0.790 | 0.863     | 0.772  | 4.055 |
| Neural network         | 0.808 | 0.860    | 0.855 | 0.854     | 0.860  | 4.237 |
| Random forest          | 0.828 | 0.825    | 0.804 | 0.811     | 0.825  | 4.093 |
| Support vector machine | 0.879 | 0.825    | 0.793 | 0.821     | 0.825  | 4.143 |

**B.** 5 extrinsic pathway-associated genes in non-small cell carcinoma.

| Method              | AUC   | Accuracy | F1    | Precision | Recall | Sum   |
|---------------------|-------|----------|-------|-----------|--------|-------|
| K-nearest neighbors | 0.745 | 0.719    | 0.669 | 0.639     | 0.719  | 3.491 |
| Logistic regression | 0.785 | 0.860    | 0.855 | 0.854     | 0.860  | 4.214 |

|                        |       |       |       |       |       |       |
|------------------------|-------|-------|-------|-------|-------|-------|
| Naïve Bayes            | 0.823 | 0.754 | 0.771 | 0.816 | 0.754 | 3.918 |
| Neural network         | 0.816 | 0.860 | 0.855 | 0.854 | 0.860 | 4.245 |
| Random forest          | 0.807 | 0.807 | 0.798 | 0.794 | 0.807 | 4.013 |
| Support vector machine | 0.780 | 0.860 | 0.834 | 0.881 | 0.860 | 4.215 |

C. 15 intrinsic pathway-associated genes in adenocarcinoma.

| Method                 | AUC   | Accuracy | F1    | Precision | Recall | Sum   |
|------------------------|-------|----------|-------|-----------|--------|-------|
| K-nearest neighbors    | 0.902 | 0.871    | 0.85  | 0.889     | 0.871  | 4.383 |
| Logistic regression    | 1     | 0.968    | 0.967 | 0.969     | 0.968  | 4.872 |
| Naïve Bayes            | 0.994 | 0.871    | 0.879 | 0.918     | 0.871  | 4.533 |
| Neural network         | 0.946 | 0.903    | 0.9   | 0.9       | 0.903  | 4.552 |
| Random forest          | 0.929 | 0.903    | 0.893 | 0.914     | 0.903  | 4.542 |
| Support vector machine | 0.976 | 0.935    | 0.931 | 0.940     | 0.935  | 4.717 |

D. 15 extrinsic pathway-associated genes in adenocarcinoma.

| Method                 | AUC   | Accuracy | F1    | Precision | Recall | Sum   |
|------------------------|-------|----------|-------|-----------|--------|-------|
| K-nearest neighbors    | 0.696 | 0.774    | 0.676 | 0.599     | 0.774  | 3.519 |
| Logistic regression    | 0.673 | 0.806    | 0.775 | 0.786     | 0.806  | 3.846 |
| Naïve Bayes            | 0.839 | 0.677    | 0.704 | 0.816     | 0.677  | 3.713 |
| Neural network         | 0.881 | 0.935    | 0.931 | 0.940     | 0.935  | 4.622 |
| Random forest          | 0.884 | 0.806    | 0.775 | 0.786     | 0.806  | 4.057 |
| Support vector machine | 1     | 0.935    | 0.931 | 0.94      | 0.935  | 4.741 |

E. 5 intrinsic pathway-associated genes in squamous cell carcinoma.

| Method                 | AUC   | Accuracy | F1    | Precision | Recall | Sum   |
|------------------------|-------|----------|-------|-----------|--------|-------|
| K-nearest neighbors    | 0.708 | 0.808    | 0.750 | 0.846     | 0.808  | 3.92  |
| Logistic regression    | 0.742 | 0.769    | 0.780 | 0.799     | 0.799  | 3.889 |
| Naïve Bayes            | 0.900 | 0.846    | 0.853 | 0.871     | 0.846  | 4.316 |
| Neural network         | 0.842 | 0.923    | 0.917 | 0.930     | 0.923  | 4.535 |
| Random forest          | 0.783 | 0.808    | 0.782 | 0.789     | 0.808  | 3.97  |
| Support vector machine | 0.808 | 0.846    | 0.834 | 0.837     | 0.846  | 4.171 |

F.10 extrinsic pathway-associated genes in squamous cell carcinoma.

| Method                 | AUC   | Accuracy | F1    | Precision | Recall | Sum   |
|------------------------|-------|----------|-------|-----------|--------|-------|
| K-nearest neighbors    | 0.675 | 0.769    | 0.722 | 0.724     | 0.769  | 3.659 |
| Logistic regression    | 0.525 | 0.654    | 0.674 | 0.710     | 0.654  | 3.217 |
| Naïve Bayes            | 0.883 | 0.731    | 0.751 | 0.823     | 0.731  | 3.919 |
| Neural network         | 0.675 | 0.731    | 0.722 | 0.715     | 0.731  | 3.574 |
| Random forest          | 0.871 | 0.808    | 0.801 | 0.798     | 0.808  | 4.086 |
| Support vector machine | 0.792 | 0.846    | 0.834 | 0.837     | 0.846  | 4.155 |

**Table S6.** Classification performances of machine-learning models for ayers 13 genes signature.**A. Adenocarcinoma.**

| Method                 | AUC   | Accuracy | F1    | Precision | Recall | Sum   |
|------------------------|-------|----------|-------|-----------|--------|-------|
| K-nearest neighbors    | 0.598 | 0.742    | 0.659 | 0.594     | 0.742  | 3.335 |
| Logistic regression    | 0.571 | 0.742    | 0.742 | 0.742     | 0.742  | 3.539 |
| Naïve Bayes            | 0.714 | 0.581    | 0.614 | 0.742     | 0.581  | 3.232 |
| Neural network         | 0.452 | 0.645    | 0.607 | 0.573     | 0.645  | 2.922 |
| Random forest          | 0.506 | 0.710    | 0.643 | 0.587     | 0.710  | 3.156 |
| Support vector machine | 0.137 | 0.742    | 0.659 | 0.594     | 0.742  | 2.874 |

#### B. Squamous cell carcinoma.

| Method                 | AUC   | Accuracy | F1    | Precision | Recall | Sum   |
|------------------------|-------|----------|-------|-----------|--------|-------|
| K-nearest neighbors    | 0.517 | 0.731    | 0.650 | 0.585     | 0.731  | 3.214 |
| Logistic regression    | 0.850 | 0.923    | 0.923 | 0.923     | 0.923  | 4.542 |
| Naïve Bayes            | 0.783 | 0.692    | 0.715 | 0.868     | 0.692  | 3.75  |
| Neural network         | 0.742 | 0.731    | 0.722 | 0.715     | 0.731  | 3.641 |
| Random forest          | 0.733 | 0.769    | 0.752 | 0.745     | 0.769  | 3.768 |
| Support vector machine | 0.500 | 0.769    | 0.669 | 0.592     | 0.769  | 3.299 |

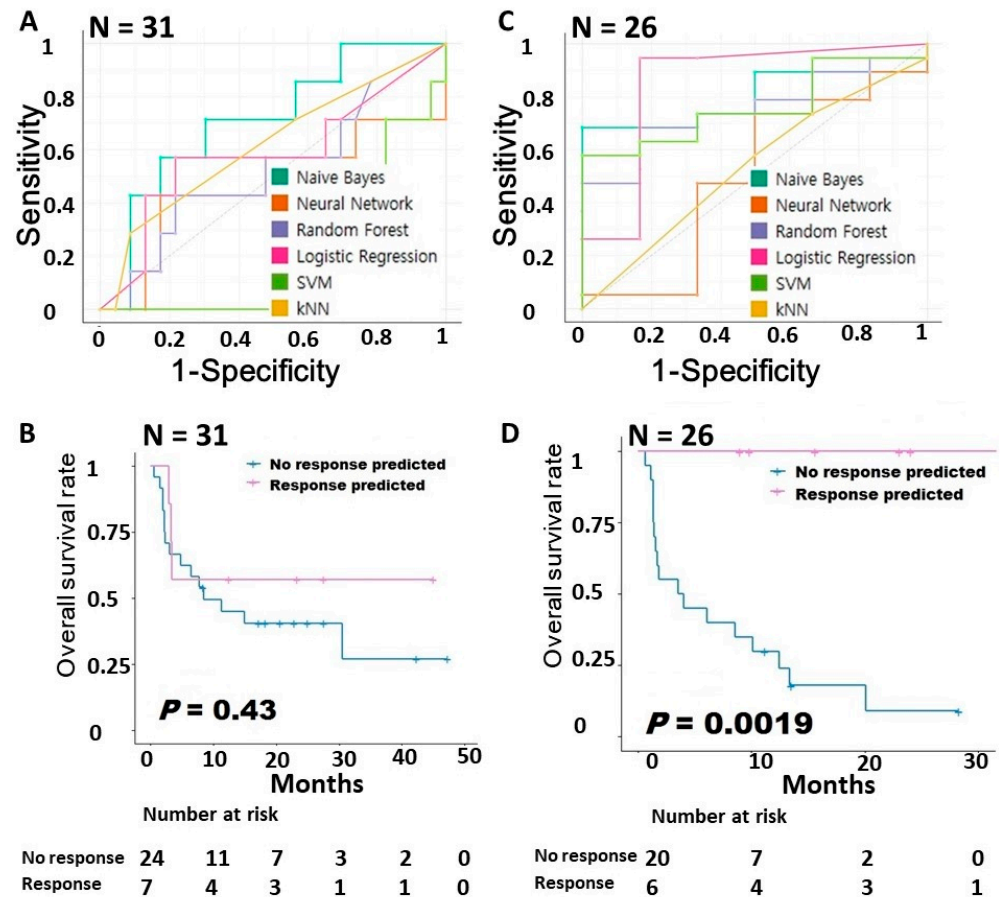

**Figure S1.** Building a predictive model for responsiveness to PD-1 inhibitors using Ayers' 13 extended immune gene signatures. (A) Comparison of the AUCs for Ayers' 13 extended immune gene signatures in LUAD according to six machine learning models. (B) Survival analysis according to Ayers' 13 ex-tended immune gene signatures in LUAD. (C) Comparison of the AUCs for Ayers' 13 extended immune gene signatures in LUSC according to six machine learning models. (D) Survival analysis according to Ayers' 13 extended immune gene signatures in LUSC. AUC, area under the

ROC curve; LUAD, lung adenocarcinoma; LUSC, lung squamous cell carcinoma; PD-1, programmed cell death protein 1.

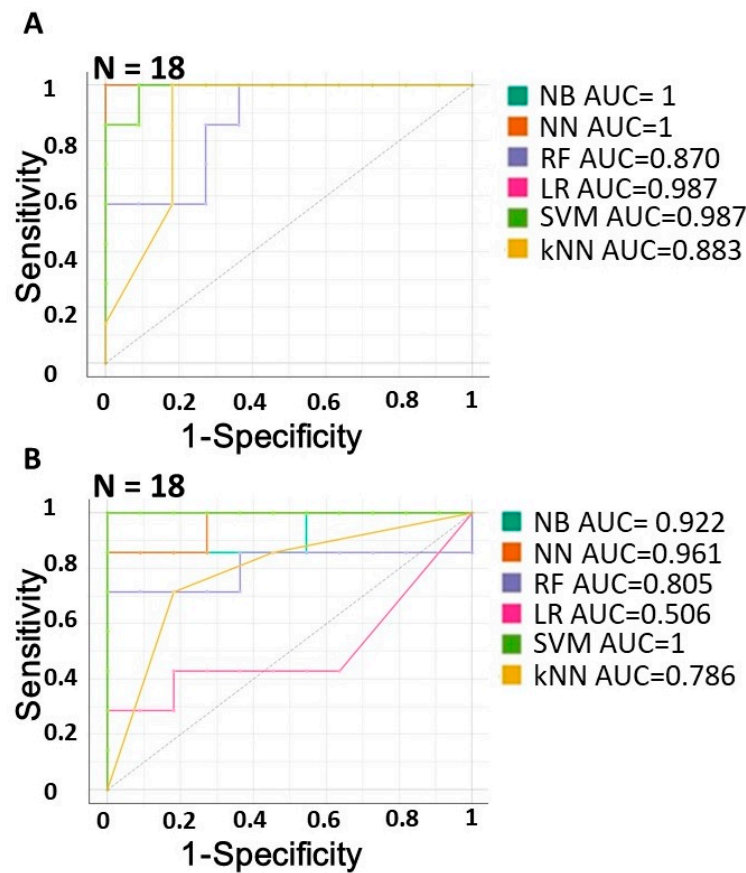

**Figure S2.** Building a predictive model for responsiveness to PD-1 inhibitors according to EGFR mutation. (A) Comparison of the AUCs for 15 intrinsic pathway-associated genes in LUAD in EGFR negative group. (B) Comparison of the AUCs for 15 extrinsic pathway-associated genes in LUAD in EGFR negative group.

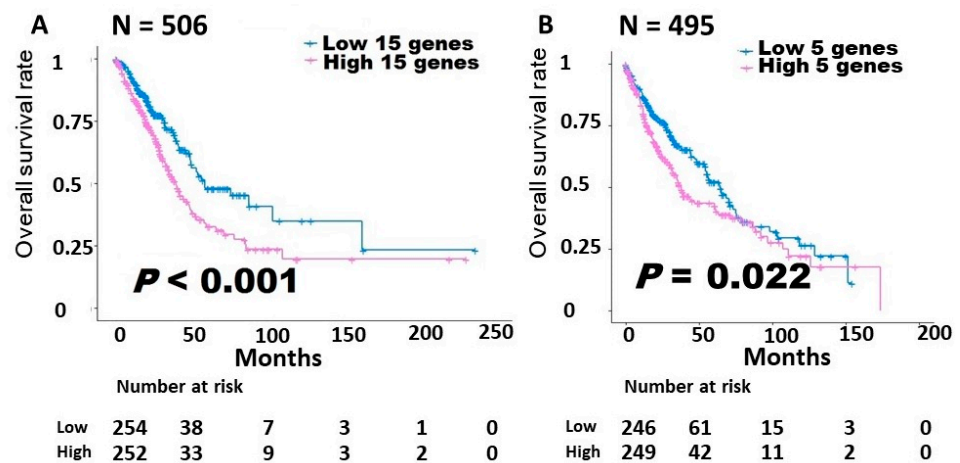

**Figure S3.** Survival analysis according to the intrinsic gene signature in TCGA data. (A) Overall survival according to the intrinsic gene signature in TCGA data for LUAD. (B) Overall survival according to the intrinsic gene signature in TCGA data for LUSC. LUAD, lung adenocarcinoma; LUSC, lung squamous cell carcinoma; TCGA, The Cancer Genome Atlas.

**Data S1.**

The nCounter® Tumor Signaling 360 contains 760 genes and up to 20 genes can be added. Currently, the most widely used method for predicting response to PD-1 inhibitors is PD-L1 immunohistochemistry<sup>1</sup>. Therefore, we judged that the intrinsic gene for predicting the response to PD-1 inhibitor would also be closely related to PD-L1 expression. We performed gene set enrichment analysis (GSEA) on RNA-sequencing data from cBioportal to confirm the intrinsic genes associated with PD-L1 expression<sup>2</sup>. Two datasets (TCGA, Firehose Legacy and OncoSG) were used for lung adenocarcinoma, and one dataset was used for lung squamous cell carcinoma (TCGA, Firehose Legacy). In GSEA analysis, if the p value was less than 0.05 and the False Discovery Rate (FDR) was less than 0.25, the pathways were considered statistically significant. In two lung adenocarcinoma dataset, seven intrinsic pathways (KRAS\_SIGNALING\_UP, APOPTOSIS, HYPOXIA, EPITHELIAL\_MESENCHYMAL\_TRANSITION, PI3K\_AKT\_MTOR\_SIGNALING, APICAL\_SURFACE, APICAL\_JUNCTION) increased expression in the PD-L1 expression upregulated group. In lung squamous cell carcinoma dataset, six intrinsic pathways (HEME\_METABOLISM, REACTIVE\_OXYGEN\_SPECIES\_PATHWAY, KRAS\_SIGNALING\_UP, APICAL\_SURFACE, XENOBIOTIC\_METABOLISM, PI3K\_AKT\_MTOR\_SIGNALING) increased expression in the PD-L1 expression upregulated group. Each pathway contains a gene list. In lung adenocarcinoma, genes with a high rank were selected while overlapping in the TCGA and OncoSG datasets in the entire pathway. Similarly, in lung squamous cell carcinoma, a gene with a high rank in the entire pathway was selected. The finally selected genes were not included in the nCounter® Tumor Signaling 360 Panel, but 20 overlapping genes were selected from the lung adenocarcinoma and lung squamous cell carcinoma datasets. The added genes are FCER1G, LAPTM5, IKZF1, TNFRSF1B, RALB, DAPP1, IRF8, CLEC4A, EPB41L3, ADAMDEC1, PRDM1, GFPT2, CD37, ACTR3, MAP4K1, F13A1, NRP1, HBEGF, MKNK1, DCBLD2.

1. Shukuya T, Carbone DP. Predictive Markers for the Efficacy of Anti-PD-1/PD-L1 Antibodies in Lung Cancer. *J Thorac Oncol*. 2016;11:976-88.
2. Cerami E, Gao J, Dogrusoz U, et al. The cBio cancer genomics portal: an open platform for exploring multidimensional cancer genomics data. *Cancer Discov*. 2012;2:401-4.

**Data S2.**

Ayers et al 18 expanded immune gene signature: CD3D, IL2RG, IDO1, NKG7, CIITA, HLA-E, CD3E, CXCR6, CCL5, LAG3, GZMK, TAGAP, CD2, CXCL10, HLA-DRA, STAT1, CXCL13, GZMB.

Ayers et al 13 expanded immune gene signature in our study: CD3D, IL2RG, IDO1, NKG7, HLA-E, CD3E, CXCR6, CCL5, LAG3, GZMK, CXCL10, STAT1, GZMB.
